# Supplementary material
Source: Royal Society of Chemistry journal article supplement (doi:10.1039/d6lc00230g)
Supplement: d6lc00230g1.pdf [file d6lc00230g1.pdf]

### Supplementary Information for

## Porous microneedle-based electrochemical aptamer biosensor for collection and quantitative analysis of dry eye disease biomarkers

Eira Beryle Ko#, Tianli Hu#, Ya Zhang, Xueyan Wang, Yu Song\*, Chenjie Xu\*

a. Department of Biomedical Engineering, College of Biomedicine, City University of Hong Kong, 83 Tat Chee Avenue, Kowloon Tong, Hong Kong SAR, P. R. China

#These authors contributed equally

\*Correspondence: [yusong@cityu.edu.hk](mailto:yusong@cityu.edu.hk) (Y.S.), [chenjie.xu@cityu.edu.hk](mailto:chenjie.xu@cityu.edu.hk) (C.X.)

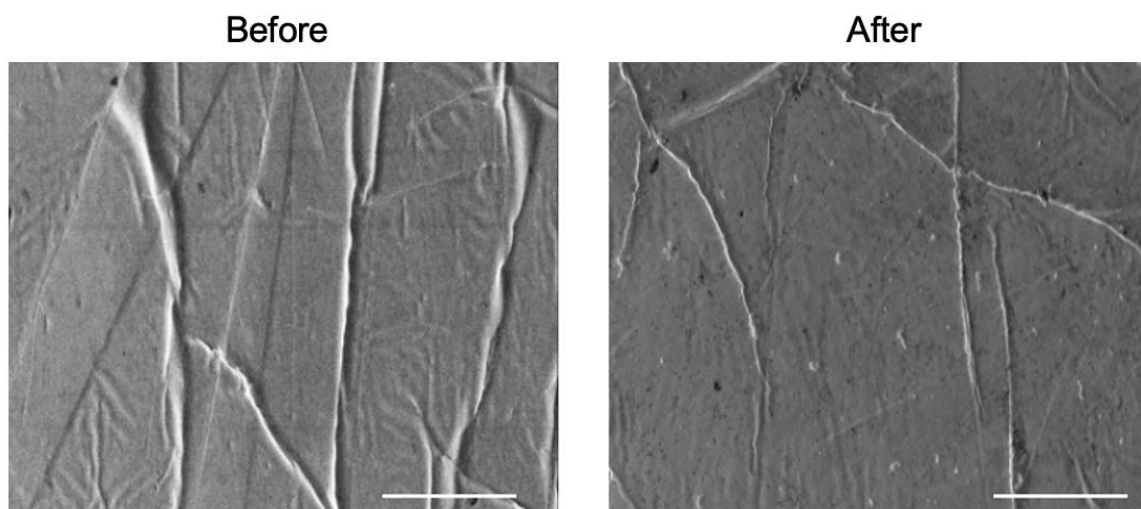

Figure S1. SEM of WE before and after electrochemical measurement with target (MMP-9), scale bar: 50  $\mu\text{m}$ .

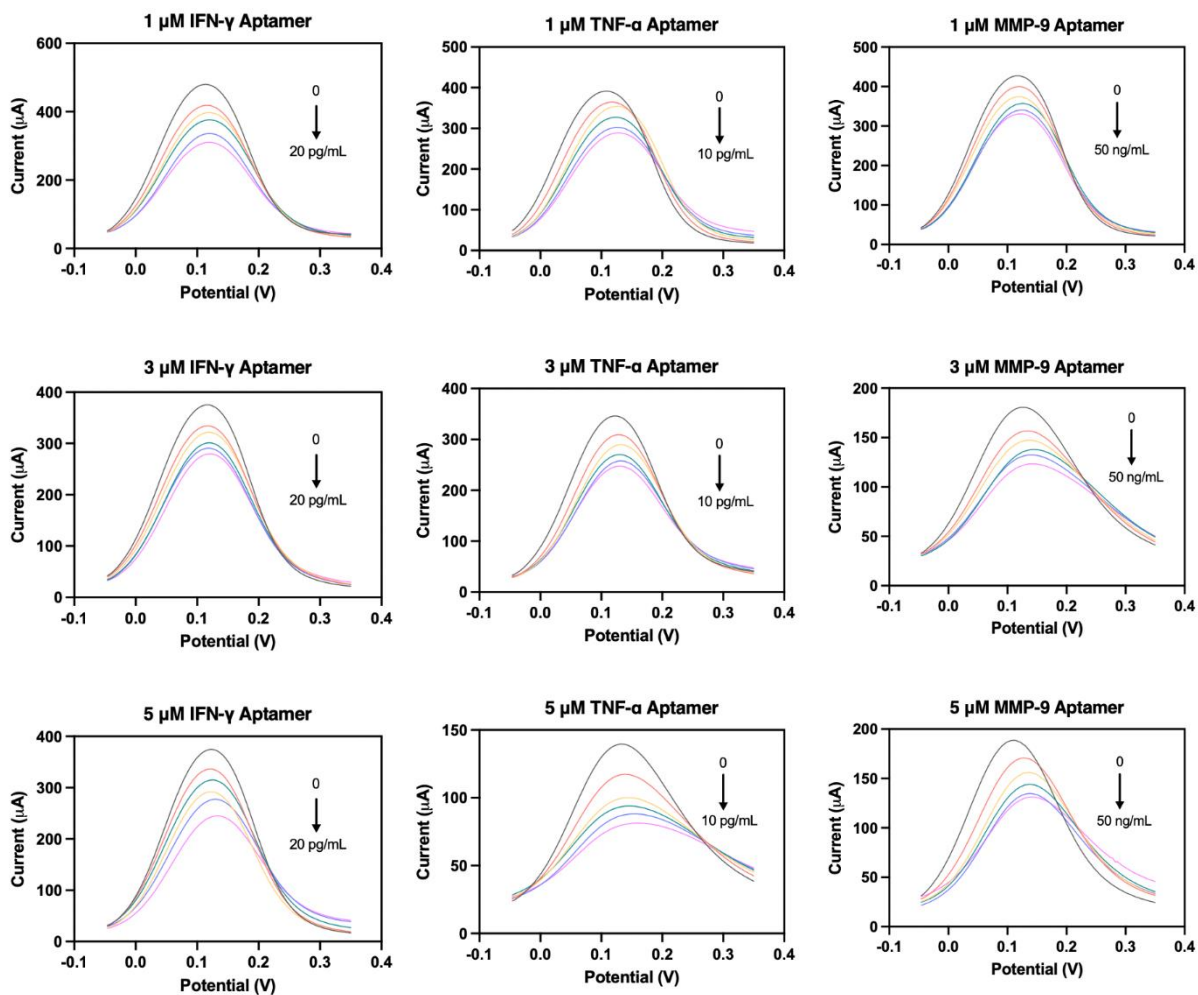

Figure S2. SWV responses of 1, 3, and 5  $\mu\text{M}$  aptamers in 0-20  $\text{pg/mL}$  IFN- $\gamma$ , 0-10  $\text{pg/mL}$  TNF- $\alpha$ , and 0-50  $\text{ng/mL}$  MMP-9.

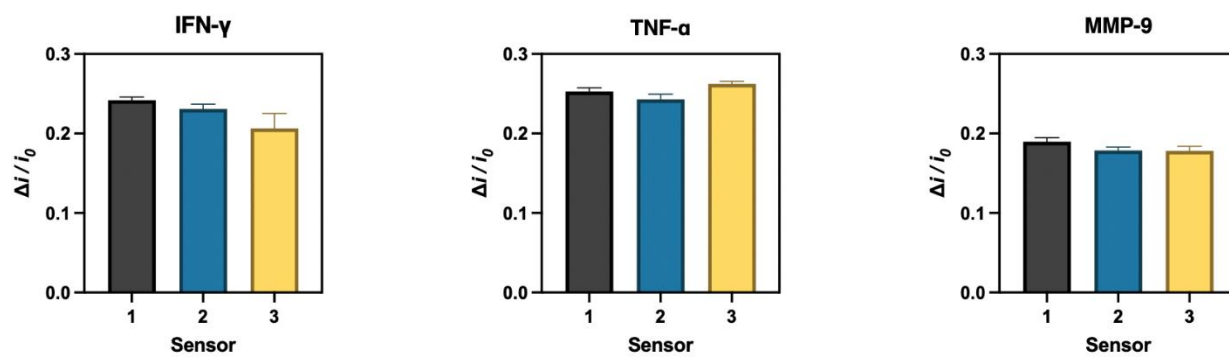

Figure S3. Reproducibility of IFN- $\gamma$ , TNF- $\alpha$ , and MMP-9 sensors in 5 pg/mL IFN- $\gamma$ , 0.5 pg/mL TNF- $\alpha$ , and 20 ng/mL MMP-9 respectively.

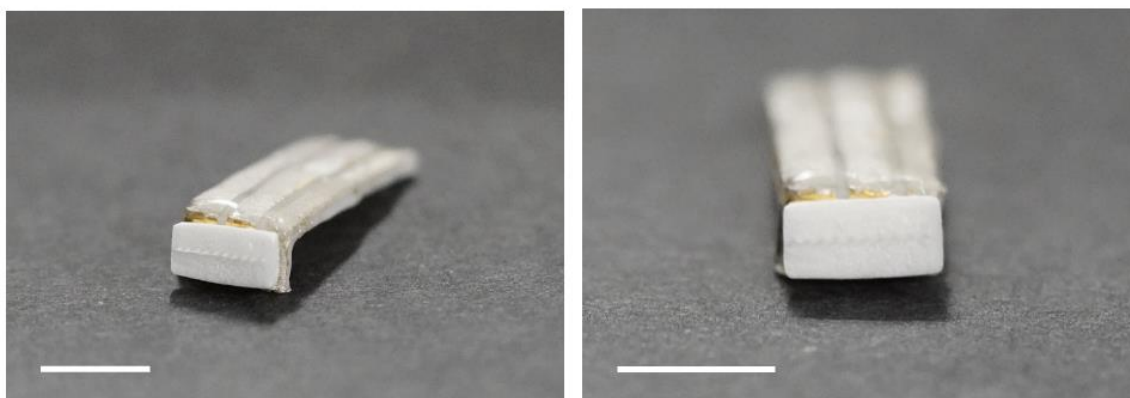

Figure S4. Digital images of the device with MN and aptamer sensor, scale bar: 7.5 mm.

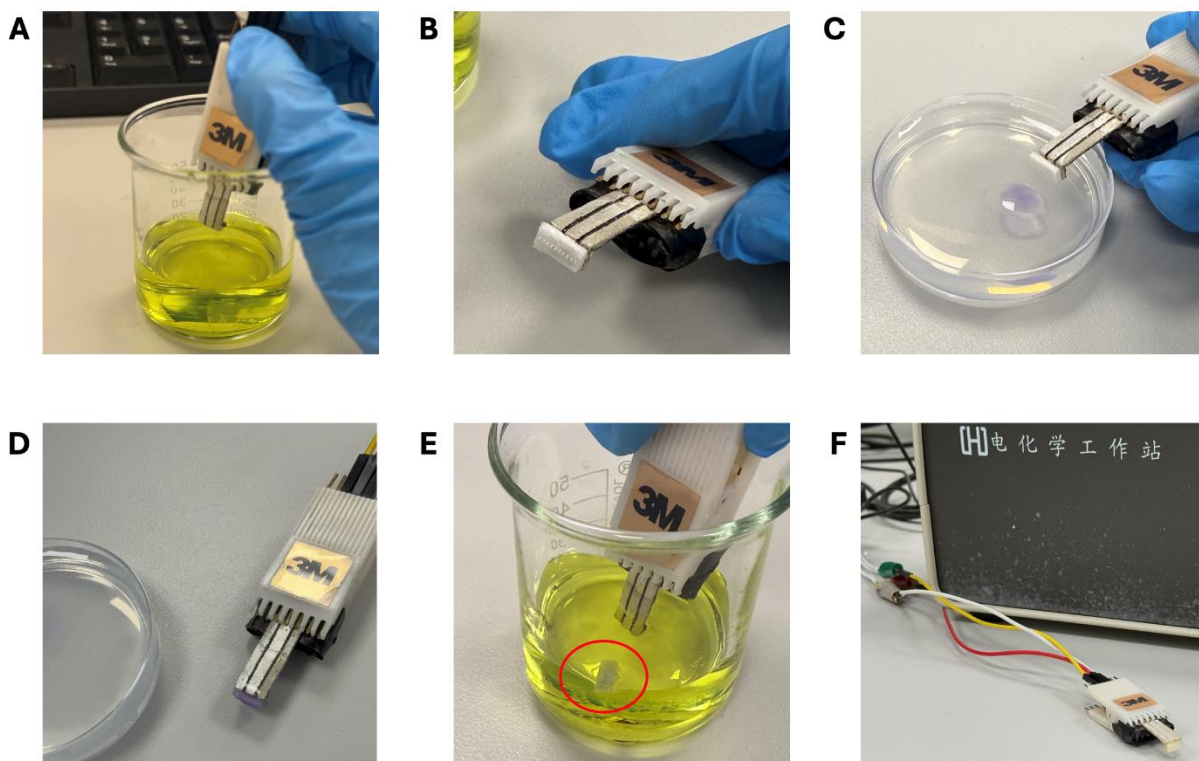

Figure S5. Demonstration of the collection-to-detection workflow *in vitro*. Digital images of (A) the baseline SWV measurement of aptamer sensor in  $\text{Fe}(\text{CN})_6^{3-/4-}$ ; (B) the completion of the integrated device by attaching APC-MN; (C) the collection of crystal violet dye from hydrogel model; (D) the absorption of crystal violets dye from MN tips to base which is in direct contact with the sensing interface; (E) the detachment of MN (circled in red) from the device when immersed in  $\text{Fe}(\text{CN})_6^{3-/4-}$ ; (F) the set-up of device connected to the electrochemical workstation.

Supporting Video S1. Absorption of crystal violet dye from hydrogel model to APC-MN using the integrated device.

Supporting Video S2. Detachment of APC-MN from device in  $\text{Fe}(\text{CN})_6^{3-/4-}$ .
